# Supplementary material
Source: Research Square preprint supplement (doi:10.21203/rs.3.rs-9697285/v1)
Supplement: Supplementary file 1 [file 22cccf98fb67e036f5f23726.pdf]

## Supplementary Methods

### PET/CT imaging and analysis methods

$^{11}\text{C}$ -CFT and  $^{18}\text{F}$ -FDG with  $\geq 95\%$  radiochemical purity were produced using an HM-12 cyclotron (Sumitomo Heavy Industries, Ltd., Kyoto, Japan). Brain PET/CT examinations were performed using a Siemens Discovery 16HR PET/CT (Siemens, Berlin, Germany). All patients fasted for at least 6 hours, and discontinued dopaminergic drugs for at least 12 hours prior to the scan. An  $^{11}\text{C}$ -CFT PET scan lasting 10 min was started 60 min<sup>1</sup> following the intravenous injection of 370 MBq<sup>2</sup> of  $^{11}\text{C}$ -CFT; and an  $^{18}\text{F}$ -FDG PET scan of 10 min was started 60 min<sup>3</sup> after the intravenous injection of 3.7 MBq/Kg<sup>4</sup> of  $^{18}\text{F}$ -FDG. All participants were asked to remain in a quiet, dark environment before the scan. We used a head rest to hold the patient's head motionless during the scanning process to prevent head movements from affecting the results. Two PET examinations were completed within one week. A CT scan of the brain was initially conducted using a fixed tube voltage of 120 kV (tube current 100 mA) for attenuation correction and anatomical localization, followed by a PET scan in the 3D mode. The attenuation of PET images was finally corrected using CT data, followed by iterative image reconstruction to obtain cross-sectional, coronal, sagittal CT, PET, and PET/CT images. Using the 3D ordered-subset expectation maximization (OSEM) algorithm (4 iterations, 24 subsets; Gaussian filter: 2 mm; zoom: 3; thickness: 3 mm; FOV: 585 mm\*162 mm), PET images were reconstructed using the manufacturer's scatter, and random correction in addition to CT-based attenuation correction was performed. The reconstructed images measured 0.68×0.68×1.5 mm in voxel size and 400×400×148 in matrix size.

$^{11}\text{C}$ -CFT PET/CT images were processed using a toolbox for spatial normalization of brain PET images (SNBPI;

<https://github.com/IHEP-Brain-Imaging/Spatial-Normalization-of-Brain-PET-Images>; Chinese Academy of Sciences, Beijing, China)<sup>5</sup> running on MATLAB 2022a (MathWorks Inc., Natick, MA, USA). Using SNBPI based on the DARTEL method, each image was spatially normalized to the Montreal Neurological Institute brain space, resliced to 2-2-2 mm, and smoothed with an isotropic 3D Gaussian kernel (FWHM = 8-8-8 mm) using SPM12 statistical parametric mapping software (Wellcome Department of Imaging Neuroscience, London, UK). The regions of interest (ROIs) in the bilateral caudate and anterior and posterior putamen, as well as the occipital lobe, were extracted from the anatomical automatic labeling (AAL) atlas using SNBPI. In the AAL atlas, the putamen is automatically separated into two equally sized segments. The first half was identified as the anterior putamen, and the second as the posterior putamen. The mean standardized uptake value ratio (SUV<sub>R</sub>) was automatically generated for each ROI, using the following formula: (striatum-occipital)/occipital count, with the occipital lobe serving as a background reference. The average SUV<sub>R</sub> was determined using the values from both sides of the caudate and putamen<sup>6</sup>.

$^{18}\text{F}$ -FDG PET/CT images were quantitatively processed using CortexID Suite software (GE HealthCare, Chicago, IL, USA). This software extracts peak cortical activity from a preset selection of pixels on the brain surface using a 3D stereotactic surface projection method and automatic normalization of the brain anatomy by rotation correction and stereotactic transformation. This activity was compared with that of an age-matched database of healthy

controls using Z-score subtraction, yielding hypometabolic (Z-score) maps in eight standard directions. The ROI was automatically determined in 26 areas, including the bilateral lateral and medial prefrontal and temporal, sensorimotor, precuneus, inferior and superior parietal, anterior and posterior cingulate, lateral occipital, primary visual cortices, whole cerebellum, and pons regions. SUVRs were calculated, with whole-brain mean values serving as a reference<sup>7</sup>. Z-scores, which represent deviations from normal data, were calculated as follows:  $Z = (\text{SUVR}_{\text{subj}} - \text{SUVR}_{\text{normal}}) / \text{SD}_{\text{normal}}$ , where  $\text{SUVR}_{\text{subj}}$  represents the mean SUVR of the study subject,  $\text{SUVR}_{\text{normal}}$  represents the mean SUVR from the normal database, and  $\text{SD}_{\text{normal}}$  represents the standard deviation (SD) of the SUVR from the normal database<sup>8-11</sup>.

The metabolism of the caudate, putamen and thalamus on <sup>18</sup>F-FDG PET/CT was analyzed using toolbox SNBPI running on MATLAB 2022a. Each image was spatially normalized to MNI space based on DARTEL algorithm and resliced to 2-2-2mm. Then utilizing SPM12 to smooth using an isotropic 3D Gaussian kernel (FWHM = 8-8-8 mm). The ROIs of the bilateral putamen, caudate and thalamus for each patient were retrieved from the AAL atlas. The whole brain was selected as the reference area to automatically calculate the SUVR. The mean SUVR value was automatically calculated for each ROI. In addition, 43 age-matched healthy individuals from the Physical Examination Center of the First Hospital of Jilin University were selected as the normal control group and their SUVRs for each ROI were calculated. The Z-scores were calculated using the Z-score formula described above.

## References

1. Yang YJ, Ge JJ, Liu FT, et al. Preserved caudate function in young-onset patients with Parkinson's disease: a dual-tracer PET imaging study. *Ther Adv Neurol Disord* 2019;12:1756286419851400.
2. Zhao Y, Wu P, Wu JJ, et al. Decoding the dopamine transporter imaging for the differential diagnosis of parkinsonism using deep learning. *Eur J Nucl Med Mol Imaging* 2022;49(8):2798-2811.
3. Huang ZM, Jiang CF, Li L, et al. Correlations between dopaminergic dysfunction and abnormal metabolic network activity in REM sleep behavior disorder. *J Cereb Blood Flow Metab* 2020;40(3):552-562.
4. Hu XH, Sun X, Hu F, et al. Multivariate radiomics models based on (18)F-FDG hybrid PET/MRI for distinguishing between Parkinson's disease and multiple system atrophy. *Eur J Nucl Med Mol Imaging* 2021;48(11):3469-3481.
5. Zhang TH, Nie BB, Liu H, Shan BC, Alzheimer's Disease Neuroimaging I. Unified spatial normalization method of brain PET images using adaptive probabilistic brain atlas. *Eur J Nucl Med Mol Imaging* 2022;49(9):3073-3085.
6. Perju-Dumbrava LD, Kovacs GG, Pirker S, et al. Dopamine transporter imaging in autopsy-confirmed Parkinson's disease and multiple system atrophy. *Mov Disord* 2012;27(1):65-71.
7. Lindstrom E, Danfors T, Lindsjo L, Lubberink M. Brain-PET image reconstruction methods affect software-aided diagnosis in patients with neurodegenerative diseases. *J Nucl Med* 2018;59:1780.
8. Minoshima S, Koeppe RA, Frey KA, Kuhl DE. Anatomic standardization: linear scaling and nonlinear warping of functional brain images. *J Nucl Med* 1994;35(9):1528-1537.

9. Minoshima S, Koeppe RA, Mintun MA, et al. Automated detection of the intercommissural line for stereotactic localization of functional brain images. *J Nucl Med* 1994;34(2):322.
10. Minoshima S, Berger KL, Lee KS, Mintun MA. An Automated Method for Rotational Correction and Centering of Three-Dimensional Functional Brain Images. *J Nucl Med* 1992;33(8):1579-1585.
11. Minoshima S, Frey KA, Koeppe RA, Foster NL, Kuhl DE. A Diagnostic Approach in Alzheimer's Disease Using Three-Dimensional Stereotactic Surface Projections of Fluorine-18-FDG PET. *J Nuc Med* 1995;36(7):1238-1248.

**Supplement Table 1 *GBA* variants identified in GBA-PD group.**

| Class of variant | Cases | Allele name (HGVS) | Chromosomal position | Nucleotide change | Exon | Variant type | RS (dbSNP)   |
|------------------|-------|--------------------|----------------------|-------------------|------|--------------|--------------|
| severe           | 3     | D448H              | Chr1:155235727       | c.1342G>C         | 10   | Missense     | rs1064651    |
| severe           | 3     | G241R              | Chr1:155238174       | c.721G>A          | 7    | Missense     | rs409652     |
| severe           | 1     | R170H              | Chr1:155238596       | c.509G>A          | 6    | Missense     | rs80356763   |
| severe           | 1     | R159W              | Chr1:155238630       | c.475C>T          | 6    | Missense     | rs439898     |
| mild             | 3     | L303I              | Chr1:155237433       | c.907C>A          | 8    | Missense     | rs1296507371 |
| mild             | 3     | L424P              | Chr1:155235798       | c.1271T>C         | 10   | Missense     | rs772548282  |
| mild             | 1     | R87Q               | Chr1:155239933       | c.260G>A          | 4    | Missense     | rs78769774   |
| mild             | 1     | N431S              | Chr1:155235777       | c.1292A>G         | 10   | Missense     | rs77738682   |
| unknown          | 1     | A229T              | Chr1:155238210       | c.685G>A          | 7    | Missense     | -            |
| unknown          | 1     | P240H              | Chr1:155238176       | c.719C>A          | 7    | Missense     | -            |
| unknown          | 1     | E293Nfs*11         | Chr1:155237464       | c.876del          | 8    | Frameshift   | -            |
| unknown          | 1     | R8G                | Chr1:155241091       | c.22A>G           | 2    | Missense     | -            |
| unknown          | 1     | H313R              | Chr1:155237402       | c.938A>G          | 8    | Missense     | -            |
| unknown          | 2     | Q182*              | Chr1:155238561       | c.544C>T          | 6    | Stop gained  | -            |
| unknown          | 1     | Q389H              | Chr1:155236302       | c.1167G>T         | 23   | Missense     | -            |
| unknown          | 1     | P178L              | Chr1:155208363       | c.533C>T          | 6    | Missense     | -            |

GBA-PD, glucocerebrosidase-related Parkinson disease; PD, Parkinson disease.

**Supplement Table 2 p-value from the one-sample t-test for the analysis of <sup>18</sup>F-FDG Z-scores for the two groups.**

| Region of interest  | p <sup>1</sup> Value | p <sup>2</sup> Value |
|---------------------|----------------------|----------------------|
| Prefrontal Lateral  | < <b>0.001*</b>      | < <b>0.001*</b>      |
| Prefrontal Medial   | <b>0.002*</b>        | < <b>0.001*</b>      |
| Sensorimotor        | 0.224                | < <b>0.001*</b>      |
| Anterior Cingulate  | 0.913                | 0.669                |
| Posterior Cingulate | 0.079                | <b>0.002*</b>        |
| Precuneus           | < <b>0.001*</b>      | < <b>0.001*</b>      |
| Parietal Superior   | < <b>0.001*</b>      | < <b>0.001*</b>      |
| Parietal Inferior   | < <b>0.001*</b>      | < <b>0.001*</b>      |
| Occipital Lateral   | < <b>0.001*</b>      | 0.525                |
| Primary Visual      | <b>0.010*</b>        | < <b>0.001*</b>      |
| Temporal Lateral    | 0.535                | 0.206                |
| Temporal Mesial     | 0.528                | 0.080                |
| Cerebellum Whole    | 0.219                | 0.565                |
| Pons                | 0.612                | 0.764                |
| Caudate             | 0.126                | <b>0.015*</b>        |
| Putamen             | <b>0.024*</b>        | <b>0.028*</b>        |
| Thalamus            | <b>0.014*</b>        | < <b>0.001*</b>      |

p<sup>1</sup> and p<sup>2</sup> values were calculated by one-sample t-test, which was used to assess the distribution of Z-score for different diseases relative to the normal subject database from CortexID Suite software and the hospital physical examination center (Z-score = 0). p<sup>1</sup>, the p value for GBA-PD; p<sup>2</sup>, the p value for NGBA-PD; GBA-PD, glucocerebrosidase-related Parkinson disease; NGBA-PD, non-glucocerebrosidase-related Parkinson disease; PD, Parkinson disease; \*, p < 0.05.

**Supplement Table 3 Clinical data after 3-year follow-up of GBA-PD, NGBA-PD, and GBA-PD subgroups.**

|                          | GBA-PD <sup>1</sup> | GBA-PD <sup>2</sup> | NGBA-PD            | p <sup>1</sup> Value          | p <sup>2</sup> Value         | Severe             | Mild               | Unknown            |
|--------------------------|---------------------|---------------------|--------------------|-------------------------------|------------------------------|--------------------|--------------------|--------------------|
| n                        | 24                  | 16                  | 247                | -                             | -                            | 8                  | 8                  | 8                  |
| LEDD, mean (SD)          | 684.19<br>(429.01)  | 634.25<br>(389.84)  | 447.19<br>(265.29) | <b>&lt;0.001<sup>a*</sup></b> | <b>0.004<sup>*</sup></b>     | 554.28<br>(232.63) | 714.22<br>(506.87) | 784.06<br>(511.83) |
| H-Y stage, mean (SD)     | 2.33 (0.75)         | 2.31 (0.68)         | 1.95 (0.82)        | <b>0.007<sup>*</sup></b>      | <b>0.027<sup>*</sup></b>     | 2.25 (0.85)        | 2.38 (0.52)        | 2.34 (0.92)        |
| MDS-UPDRS-I, mean (SD)   | 14.79 (5.79)        | 14.81 (4.17)        | 11.76 (6.21)       | <b>0.010<sup>*</sup></b>      | <b>0.020<sup>*</sup></b>     | 14.88 (4.73)       | 14.75 (3.85)       | 14.75 (8.55)       |
| MDS-UPDRS-II, mean (SD)  | 17.00 (6.72)        | 18.69 (6.15)        | 13.77 (6.69)       | <b>&lt;0.001<sup>*</sup></b>  | <b>&lt;0.001<sup>*</sup></b> | 20.38 (7.44)       | 17.00 (4.38)       | 13.63 (6.93)       |
| MDS-UPDRS-III, mean (SD) | 44.42<br>(18.77)    | 47.19<br>(16.43)    | 34.40<br>(19.09)   | <b>&lt;0.001<sup>*</sup></b>  | <b>&lt;0.001<sup>*</sup></b> | 53.88<br>(12.16)   | 40.50<br>(18.12)   | 38.88<br>(22.94)   |
| Motor subtype, No. (%)   |                     |                     |                    |                               |                              |                    |                    |                    |
| PIGD                     | 16 (52.00)          | 10 (62.50)          | 111 (40.94)        | 0.086                         | 0.097                        | 4 (50.00)          | 6 (75.00)          | 6 (75.00)          |
| TD                       | 7 (40.00)           | 4 (25.00)           | 106 (44.20)        | 0.361                         | 0.149                        | 2 (25.00)          | 2 (25.00)          | 2 (25.00)          |
| Indeterminate            | 1 (8.00)            | 2 (12.50)           | 30 (14.86)         | 0.234                         | 0.516                        | 2 (25.00)          | 0                  | 0                  |
| MoCA, mean (SD)          | 18.54 (4.41)        | 17.94 (4.73)        | 20.09 (5.19)       | <b>&lt;0.001<sup>*</sup></b>  | <b>&lt;0.001<sup>*</sup></b> | 15.50 (5.29)       | 20.38 (2.50)       | 19.75 (3.69)       |
| HAMD, mean (SD)          | 12.96 (6.00)        | 12.75 (5.87)        | 8.77 (5.52)        | <b>&lt;0.001<sup>*</sup></b>  | <b>0.001<sup>*</sup></b>     | 15.63 (5.48)       | 9.88 (5.00)        | 13.38 (6.63)       |
| HAMA, mean (SD)          | 13.00 (5.71)        | 12.81 (5.04)        | 9.93 (6.43)        | <b>0.006<sup>*</sup></b>      | <b>0.022<sup>*</sup></b>     | 14.63 (4.87)       | 11.00 (4.81)       | 13.38 (7.25)       |
| PDSS-2, mean (SD)        | 16.17 (4.49)        | 16.81 (4.42)        | 11.55 (6.96)       | <b>&lt;0.001<sup>*</sup></b>  | <b>&lt;0.001<sup>*</sup></b> | 18.25 (4.80)       | 15.38 (3.74)       | 14.88 (4.64)       |

GBA-PD<sup>1</sup>, All patients with GBA-PD; GBA-PD<sup>2</sup>, GBA-PD patients without carrying the unknown variant; p<sup>1</sup>, GBA-PD<sup>1</sup> vs NGBA-PD; p<sup>2</sup>, GBA-PD<sup>2</sup> vs NGBA-PD; <sup>a</sup> Adjusted for age, sex, and disease duration at baseline; The remaining p values are calculated by adjusting for age, sex, disease duration, years of education at baseline and LEDD; GBA-PD, glucocerebrosidase-related Parkinson disease; NGBA-PD, non-glucocerebrosidase-related Parkinson disease; PD, Parkinson disease; H-Y, Hoehn and Yahr; EOPD, early onset PD; MDS-UPDRS, Movement Disorder Society Unified Parkinson Disease Rating Scale; PIGD, postural instability/gait difficulty; TD, tremor dominant; MoCA, Montreal Cognitive Assessment; HAMD, Hamilton Depression Scale; HAMA, Hamilton Anxiety Scale; PDSS, Parkinson Disease Sleep Scale; SD, standard deviation. \*, p < 0.05.

**Supplement Table 4 Simple effects analysis of variables with interactive effects in linear mixed effects models in GBA-PD and NGBA-PD patients.**

| LEDD          |           |           |                             |       |                   |         |                  |
|---------------|-----------|-----------|-----------------------------|-------|-------------------|---------|------------------|
| Group         | (I) Time  | (J) Time  | Mean value difference (I-J) | SE    | Degree of freedom | p value | 95% CI           |
| GBA-PD        | Follow-up | Baseline  | 279.63                      | 52.01 | 280.76            | <0.001* | 177.24, 382.01   |
|               | Baseline  | Follow-up | -279.63                     | 52.01 | 280.76            | <0.001* | -382.01, -177.24 |
| NGBA-PD       | Follow-up | Baseline  | 150.79                      | 16.08 | 288.03            | <0.001* | 119.15, 182.44   |
|               | Baseline  | Follow-up | 150.79                      | 16.08 | 288.03            | <0.001* | -182.44, -119.15 |
| Time          | (I) Group | (J) Group | Mean value difference (I-J) | SE    | Degree of freedom | p value | 95% CI           |
| Baseline      | GBA-PD    | NGBA-PD   | 107.46                      | 53.15 | 466.03            | 0.044*  | 129.98, 342.60   |
|               | NGBA-PD   | GBA-PD    | -107.46                     | 53.15 | 466.03            | 0.044*  | -342.60, 129.98  |
| Follow-up     | GBA-PD    | NGBA-PD   | 236.29                      | 54.10 | 478.26            | <0.001* | 3.02, 211.90     |
|               | NGBA-PD   | GBA-PD    | -236.29                     | 54.10 | 478.26            | <0.001* | -211.90, -3.02   |
| MDS-UPDRS-III |           |           |                             |       |                   |         |                  |
| Group         | (I) Time  | (J) Time  | Mean value difference (I-J) | SE    | Degree of freedom | p value | 95% CI           |
| GBA-PD        | Follow-up | Baseline  | 9.14                        | 2.64  | 276.26            | <0.001* | 3.95, 14.33      |
|               | Baseline  | Follow-up | -9.14                       | 2.64  | 276.26            | <0.001* | -14.33, 3.95     |
| NGBA-PD       | Follow-up | Baseline  | 2.92                        | 0.83  | 280.15            | <0.001* | 1.56, 4.79       |
|               | Baseline  | Follow-up | -2.92                       | 0.83  | 280.15            | <0.001* | -4.79, -1.56     |
| Time          | (I) Group | (J) Group | Mean value difference (I-J) | SE    | Degree of freedom | p value | 95% CI           |
| Baseline      | GBA-PD    | NGBA-PD   | 3.84                        | 3.90  | 375.43            | 0.325   | -3.82, 11.50     |
|               | NGBA-PD   | GBA-PD    | -3.84                       | 3.90  | 375.43            | 0.325   | -11.50, -3.82    |
| Follow-up     | GBA-PD    | NGBA-PD   | 9.80                        | 3.94  | 386.21            | 0.013*  | 2.06, 17.54      |
|               | NGBA-PD   | GBA-PD    | -9.80                       | 3.94  | 386.21            | 0.013*  | -17.54, -2.06    |
| H-Y Stage     |           |           |                             |       |                   |         |                  |
| Group         | (I) Time  | (J) Time  | Mean value difference (I-J) | SE    | Degree of freedom | p value | 95% CI           |
| GBA-PD        | Follow-up | Baseline  | 0.45                        | 0.14  | 276.04            | 0.001*  | 0.18, 0.73       |
|               | Baseline  | Follow-up | -0.45                       | 0.14  | 276.04            | 0.001*  | -0.73, -0.18     |
| NGBA-PD       | Follow-up | Baseline  | 0.11                        | 0.43  | 282.01            | 0.011*  | 0.03, 0.20       |
|               | Baseline  | Follow-up | -0.11                       | 0.43  | 282.01            | 0.011*  | -0.20, -0.03     |
| Time          | (I) Group | (J) Group | Mean value difference (I-J) | SE    | Degree of freedom | p value | 95% CI           |
| Baseline      | GBA-PD    | NGBA-PD   | 0.04                        | 0.16  | 425.66            | 0.825   | -0.28, 0.35      |
|               | NGBA-PD   | GBA-PD    | -0.04                       | 0.16  | 425.66            | 0.825   | -0.35, 0.28      |
| Follow-up     | GBA-PD    | NGBA-PD   | 0.38                        | 0.16  | 438.94            | 0.023*  | 0.05, 0.70       |
|               | NGBA-PD   | GBA-PD    | -0.38                       | 0.16  | 438.94            | 0.023*  | -0.70, 0.05      |
| MoCA          |           |           |                             |       |                   |         |                  |

| Group   | (I) Time  | (J) Time  | Mean value difference (I-J) | SE   | Degree of freedom | p value           | 95% CI       |
|---------|-----------|-----------|-----------------------------|------|-------------------|-------------------|--------------|
| GBA-PD  | Follow-up | Baseline  | -3.17                       | 0.55 | 270.13            | <b>&lt;0.001*</b> | -4.26, -2.08 |
|         | Baseline  | Follow-up | 3.17                        | 0.55 | 270.13            | <b>&lt;0.001*</b> | 2.08, 4.26   |
| NGBA-PD | Follow-up | Baseline  | -1.85                       | 0.17 | 272.49            | <b>&lt;0.001*</b> | -2.19, -1.51 |
|         | Baseline  | Follow-up | 1.85                        | 0.17 | 272.49            | <b>&lt;0.001*</b> | 1.51, 2.19   |

  

| Time      | (I) Group | (J) Group | Mean value difference (I-J) | SE   | Degree of freedom | p value | 95% CI      |
|-----------|-----------|-----------|-----------------------------|------|-------------------|---------|-------------|
| Baseline  | GBA-PD    | NGBA-PD   | -0.08                       | 1.07 | 339.11            | 0.937   | -2.19, 2.02 |
|           | NGBA-PD   | GBA-PD    | 0.08                        | 1.07 | 339.11            | 0.937   | -2.02, 2.19 |
| Follow-up | GBA-PD    | NGBA-PD   | -1.41                       | 1.08 | 346.32            | 0.192   | -3.51, 0.71 |
|           | NGBA-PD   | GBA-PD    | 1.41                        | 1.08 | 346.32            | 0.192   | 0.71, 3.51  |

  

**HAMD**

| Group   | (I) Time  | (J) Time  | Mean value difference (I-J) | SE   | Degree of freedom | p value           | 95% CI       |
|---------|-----------|-----------|-----------------------------|------|-------------------|-------------------|--------------|
| GBA-PD  | Follow-up | Baseline  | 3.34                        | 0.94 | 269.15            | <b>&lt;0.001*</b> | 1.49, 5.19   |
|         | Baseline  | Follow-up | -3.34                       | 0.94 | 269.15            | <b>&lt;0.001*</b> | -5.19, -1.49 |
| NGBA-PD | Follow-up | Baseline  | 0.68                        | 0.29 | 273.85            | <b>0.021*</b>     | 0.11, 1.25   |
|         | Baseline  | Follow-up | -0.68                       | 0.29 | 273.85            | <b>0.021*</b>     | -1.25, -0.11 |

  

| Time      | (I) Group | (J) Group | Mean value difference (I-J) | SE   | Degree of freedom | p value       | 95% CI       |
|-----------|-----------|-----------|-----------------------------|------|-------------------|---------------|--------------|
| Baseline  | GBA-PD    | NGBA-PD   | 1.41                        | 1.25 | 387.86            | 0.258         | -1.04, 3.86  |
|           | NGBA-PD   | GBA-PD    | -1.41                       | 1.25 | 387.86            | 0.258         | -2.86, 1.04  |
| Follow-up | GBA-PD    | NGBA-PD   | 4.07                        | 1.26 | 400.30            | <b>0.001*</b> | 1.59, 3.86   |
|           | NGBA-PD   | GBA-PD    | -4.07                       | 1.26 | 400.30            | <b>0.001*</b> | -3.86, -1.59 |

  

**HAMA**

| Group   | (I) Time  | (J) Time  | Mean value difference (I-J) | SE   | Degree of freedom | p value       | 95% CI       |
|---------|-----------|-----------|-----------------------------|------|-------------------|---------------|--------------|
| GBA-PD  | Follow-up | Baseline  | 2.94                        | 1.05 | 269.85            | <b>0.005*</b> | 0.88, 5.00   |
|         | Baseline  | Follow-up | -2.94                       | 1.05 | 269.85            | <b>0.005*</b> | -5.00, -0.88 |
| NGBA-PD | Follow-up | Baseline  | 0.67                        | 0.32 | 274.73            | <b>0.035*</b> | 0.05, 1.32   |
|         | Baseline  | Follow-up | -0.67                       | 0.29 | 274.73            | <b>0.035*</b> | -1.32, -0.05 |

  

| Time      | (I) Group | (J) Group | Mean value difference (I-J) | SE   | Degree of freedom | p value       | 95% CI       |
|-----------|-----------|-----------|-----------------------------|------|-------------------|---------------|--------------|
| Baseline  | GBA-PD    | NGBA-PD   | 0.65                        | 1.36 | 392.76            | 0.632         | -2.02, 3.32  |
|           | NGBA-PD   | GBA-PD    | -0.65                       | 1.36 | 392.76            | 0.632         | -3.32, 2.02  |
| Follow-up | GBA-PD    | NGBA-PD   | 2.91                        | 1.38 | 405.43            | <b>0.035*</b> | 0.20, 5.61   |
|           | NGBA-PD   | GBA-PD    | -2.91                       | 1.38 | 405.43            | <b>0.035*</b> | -5.61, -0.20 |

GBA-PD, glucocerebrosidase-related Parkinson disease; NGBA-PD, non-glucocerebrosidase-related Parkinson disease; PD, Parkinson disease; LEDD, levodopa equivalent daily dose; H-Y, Hoehn and Yahr; MDS-UPDRS, Movement Disorder Society Unified Parkinson Disease Rating Scale; MoCA, Montreal Cognitive Assessment; HAMD, Hamilton Depression Scale; HAMA, Hamilton Anxiety Scale; SE, standard error; CI, confidence interval; \*, p < 0.05.

**Supplement Table 5 Comparison of annual progression rates in clinical scales between GBA-PD and NGBA-PD patients.**

|                          | GBA-PD            | NGBA-PD       | p Value       | Severe            | Mild          | Unknow            |
|--------------------------|-------------------|---------------|---------------|-------------------|---------------|-------------------|
| n                        | 24                | 247           | -             | 8                 | 8             | 8                 |
| LEDD, mean (SD)          | 83.60<br>(115.80) | 51.85 (80.38) | 0.078         | 89.03<br>(150.50) | 81.50 (63.97) | 80.30<br>(131.40) |
| H-Y stage, mean (SD)     | 0.11 (0.26)       | 0.03 (0.23)   | 0.064         | 0.01 (0.36)       | 0.15 (0.14)   | 0.17 (0.22)       |
| MDS-UPDRS-I, mean (SD)   | 0.82 (0.67)       | 0.47 (1.45)   | 0.205         | 1.05 (0.72)       | 0.65 (0.78)   | 0.75 (0.48)       |
| MDS-UPDRS-II, mean (SD)  | 0.69 (1.61)       | 0.32 (1.54)   | 0.160         | 0.81 (2.61)       | 0.46 (1.16)   | 0.80 (0.48)       |
| MDS-UPDRS-III, mean (SD) | 3.00 (1.75)       | 1.05 (4.50)   | <b>0.029*</b> | 6.23 (2.11)       | 1.90 (0.77)   | 1.46 (1.16)       |
| MoCA, mean (SD)          | -0.97 (0.35)      | -0.62 (0.93)  | 0.088         | -1.05 (0.31)      | -0.85 (0.15)  | -0.99 (0.51)      |
| HAMD, mean (SD)          | 1.01 (0.77)       | 0.23 (1.59)   | <b>0.008*</b> | 1.29 (1.12)       | 0.97 (0.36)   | 0.79 (0.65)       |
| HAMA, mean (SD)          | 0.85 (0.97)       | 0.23 (1.75)   | 0.052         | 0.83 (1.06)       | 0.88 (0.58)   | 0.83 (1.27)       |
| PDSS-2, mean (SD)        | 1.26 (1.27)       | 0.61 (2.08)   | 0.112         | 1.29 (1.72)       | 0.71 (0.58)   | 1.78 (1.16)       |

p values were calculated by generalized linear model, adjusting for age, sex, years of education, and disease duration. GBA-PD, glucocerebrosidase-related Parkinson disease; NGBA-PD, non-glucocerebrosidase-related Parkinson disease; PD, Parkinson disease; LEDD, levodopa equivalent daily dose; H-Y, Hoehn and Yahr; MDS-UPDRS, Movement Disorder Society Unified Parkinson Disease Rating Scale; MoCA, Montreal Cognitive Assessment; HAMD, Hamilton Depression Scale; HAMA, Hamilton Anxiety Scale; PDSS, Parkinson Disease Sleep Scale; SE, standard error; CI, confidence interval; \*,  $p < 0.05$ .

**Supplement Table 6 Comparison of baseline data between patients who underwent PET/CT scans and those who did not.**

|                                     | Underwent PET/CT   |                      |                     | Non-underwent PET/CT |                      |                     | p <sup>1</sup>             | p <sup>2</sup>             |
|-------------------------------------|--------------------|----------------------|---------------------|----------------------|----------------------|---------------------|----------------------------|----------------------------|
|                                     | All <sup>1</sup>   | NGBA-PD <sup>1</sup> | GBA-PD <sup>1</sup> | All <sup>2</sup>     | NGBA-PD <sup>2</sup> | GBA-PD <sup>2</sup> | Value                      | Value                      |
| n                                   | 176                | 159                  | 17                  | 125                  | 117                  | 8                   | -                          | -                          |
| Age, mean (SD), year                | 59.86<br>(10.71)   | 60.31<br>(10.69)     | 55.59<br>(10.28)    | 58.79 (9.97)         | 59.15 (9.81)         | 53.63<br>(11.64)    | 0.354 <sup>a</sup>         | 0.318 <sup>a</sup>         |
| Sex, male, No. (%)                  | 75 (42.61)         | 68 (42.77)           | 7 (41.18)           | 57 (45.60)           | 53 (45.30)           | 4 (50.00)           | 0.582 <sup>b</sup>         | 0.650 <sup>b</sup>         |
| Disease duration, mean (SD), year   | 3.62 (3.17)        | 3.53 (3.20)          | 4.48 (2.85)         | 3.92 (3.86)          | 3.99 (3.96)          | 2.81 (1.89)         | 0.412 <sup>c</sup>         | 0.248 <sup>c</sup>         |
| Age at onset, mean (SD), year       | 56.24<br>(11.02)   | 56.78<br>(11.02)     | 51.12 (9.92)        | 54.88<br>(10.32)     | 55.15<br>(10.20)     | 50.81<br>(11.95)    | 0.276 <sup>d</sup>         | 0.210 <sup>d</sup>         |
| EOPD, No. (%)                       | 57 (32.39)         | 49 (30.82)           | 8 (47.06)           | 45 (36.00)           | 41 (35.04)           | 4 (50.00)           | 0.510 <sup>d</sup>         | 0.461 <sup>d</sup>         |
| Years of education, mean (SD), year | 10.52<br>(4.03)    | 10.42 (4.02)         | 11.94 (3.96)        | 9.62 (3.70)          | 9.49 (3.75)          | 11.63 (1.92)        | <b>0.030</b> <sup>*e</sup> | <b>0.033</b> <sup>*e</sup> |
| LEDD, mean (SD), mg                 | 297.69<br>(237.53) | 287.22<br>(233.97)   | 395.59<br>(255.46)  | 327.26<br>(216.13)   | 319.83<br>(207.67)   | 435.94<br>(313.68)  | 0.289 <sup>e</sup>         | 0.271 <sup>e</sup>         |
| H-Y stage, mean (SD),               | 1.80 (0.75)        | 1.81 (0.76)          | 1.88 (0.65)         | 1.88 (0.75)          | 1.88 (0.76)          | 1.81 (0.75)         | 0.672                      | 0.703                      |
| MDS-UPDRS-I, mean (SD)              | 10.40<br>(6.30)    | 10.33 (6.41)         | 11.00 (5.32)        | 10.02 (6.16)         | 9.74 (5.98)          | 14.12 (7.70)        | 0.480                      | 0.307                      |
| MDS-UPDRS-II, mean (SD)             | 12.82<br>(7.91)    | 12.81 (8.01)         | 12.94 (7.15)        | 12.86 (7.43)         | 12.50 (7.45)         | 18.13 (4.82)        | 0.745                      | 0.455                      |
| MDS-UPDRS-III, mean (SD)            | 31.55<br>(17.96)   | 31.46<br>(18.10)     | 32.35<br>(17.06)    | 30.89<br>(19.71)     | 30.26<br>(19.57)     | 40.13<br>(20.82)    | 0.337                      | 0.235                      |
| Motor subtype, No. (%)              |                    |                      |                     |                      |                      |                     |                            |                            |
| PIGD                                | 78 (44.32)         | 70 (44.03)           | 8 (47.06)           | 48 (38.40)           | 43 (36.75)           | 5 (62.50)           | 0.287                      | 0.200                      |
| TD                                  | 74 (42.05)         | 67 (42.14)           | 7 (41.18)           | 58 (46.40)           | 55 (47.01)           | 3 (37.50)           | 0.533                      | 0.507                      |
| Indeterminate                       | 24 (13.64)         | 22 (13.84)           | 2 (11.76)           | 19 (15.20)           | 19 (16.24)           | 0                   | 0.542                      | 0.406                      |
| MoCA, mean (SD)                     | 22.03<br>(5.20)    | 22.03 (5.21)         | 22.06 (5.27)        | 21.47 (4.88)         | 21.50 (4.92)         | 21.00 (4.57)        | 0.531                      | 0.563                      |
| HAMD, mean (SD)                     | 8.29 (6.05)        | 8.13 (6.10)          | 9.82 (5.50)         | 8.14 (6.56)          | 8.09 (6.57)          | 8.88 (6.75)         | 0.804                      | 0.932                      |
| HAMA, mean (SD)                     | 9.24 (6.36)        | 9.20 (6.43)          | 9.65 (5.77)         | 9.44 (6.85)          | 9.37 (6.77)          | 10.50 (8.42)        | 0.975                      | 0.986                      |
| PDSS-2, mean (SD)                   | 10.10<br>(6.12)    | 9.87 (6.24)          | 12.18 (4.49)        | 9.23 (5.27)          | 9.14 (5.31)          | 10.63 (4.72)        | 0.183                      | 0.282                      |

GBA-PD, glucocerebrosidase-related Parkinson disease; NGBA-PD, non-glucocerebrosidase-related Parkinson disease; PD, Parkinson disease; LEDD, levodopa equivalent daily dose; H-Y, Hoehn and Yahr; EOPD, early onset PD; MDS-UPDRS, Movement Disorder Society Unified Parkinson Disease Rating Scale; PIGD, postural instability/gait difficulty; TD, tremor dominant; MoCA, Montreal Cognitive Assessment; HAMD, Hamilton Depression Scale; HAMA, Hamilton Anxiety Scale; PDSS, Parkinson Disease Sleep Scale; SD, standard deviation. <sup>a</sup> Adjusted for sex, and disease duration; <sup>b</sup> Adjusted for age, and disease duration; <sup>c</sup> Adjusted for age, and sex; <sup>d</sup> Adjusted for sex; <sup>e</sup> Adjusted for age, sex, and disease duration. The remaining p values are calculated by adjusting for age, sex, disease duration, LEDD and years of education; The p<sup>1</sup> value is derived from a comparison of all patients who

underwent PET/CT with all patients who did not underwent PET/CT. The  $p^2$  value was derived from a comparison between patients who underwent PET/CT and those who did not in the NGBA-PD study. No formal statistical comparison was performed within the GBA-PD subgroup because of the small number of patients. \*,  $p < 0.05$ .

**Supplement Table 7 Attrition analysis: comparison of baseline characteristics between patients included in and excluded from the longitudinal follow-up cohort.**

|                                     | Followed patients  |                      |                     | Non-followed patients |                      |                     | p <sup>1</sup>     | p <sup>2</sup>            |
|-------------------------------------|--------------------|----------------------|---------------------|-----------------------|----------------------|---------------------|--------------------|---------------------------|
|                                     | All <sup>1</sup>   | NGBA-PD <sup>1</sup> | GBA-PD <sup>1</sup> | All <sup>2</sup>      | NGBA-PD <sup>2</sup> | GBA-PD <sup>2</sup> | Value              | Value                     |
| n                                   | 271                | 247                  | 24                  | 30                    | 29                   | 1                   | -                  | -                         |
| Age, mean (SD), year                | 59.23 (10.47)      | 59.67<br>(10.37)     | 54.67<br>(10.65)    | 61.10<br>(9.82)       | 61.07<br>(9.97)      | 62                  | 0.343 <sup>a</sup> | 0.478 <sup>a</sup>        |
| Sex, male, No. (%)                  | 115 (42.44)        | 115 (46.56)          | 10 (41.67)          | 17 (56.67)            | 16 (55.17)           | 1                   | 0.128 <sup>b</sup> | 0.184 <sup>b</sup>        |
| Disease duration, mean (SD), year   | 3.73 (3.51)        | 3.71 (3.58)          | 3.94 (2.72)         | 3.83 (3.15)           | 3.83 (3.20)          | 4                   | 0.861 <sup>c</sup> | 0.856 <sup>c</sup>        |
| Age at onset, mean (SD), year       | 55.49 (10.85)      | 55.96<br>(10.79)     | 50.73<br>(10.48)    | 57.27<br>(9.75)       | 57.24<br>(9.92)      | 58                  | 0.392 <sup>d</sup> | 0.534 <sup>d</sup>        |
| EOPD, No. (%)                       | 12 (35.06)         | 83 (33.60)           | 12 (50.00)          | 7 (23.33)             | 7 (24.14)            | 2                   | 0.201 <sup>d</sup> | 0.296 <sup>d</sup>        |
| Years of education, mean (SD), year | 10.30 (3.83)       | 10.15 (3.83)         | 11.83 (2.47)        | 9.53 (3.88)           | 9.45 (3.92)          | 12                  | 0.271 <sup>c</sup> | 0.288 <sup>c</sup>        |
| LEDD, mean (SD), mg                 | 301.28<br>(233.62) | 291.64<br>(227.87)   | 400.52<br>(272.16)  | 388.46<br>(164.83)    | 381.16<br>(162.74)   | 600                 | 0.054 <sup>c</sup> | <b>0.042<sup>e*</sup></b> |
| H-Y stage, mean (SD),               | 1.85 (0.74)        | 1.85 (0.75)          | 1.90 (0.66)         | 1.72 (0.70)           | 1.74 (0.70)          | 1                   | 0.057              | 0.107                     |
| MDS-UPDRS-I, mean (SD)              | 10.46 (6.42)       | 10.31 (6.42)         | 12.08 (6.31)        | 8.70 (3.64)           | 8.66 (3.70)          | 10                  | 0.081              | 0.111                     |
| MDS-UPDRS-II, mean (SD)             | 12.92 (8.00)       | 12.77 (8.09)         | 14.46 (6.96)        | 12.07<br>(4.11)       | 11.86 (4.02)         | 18                  | 0.162              | 0.179                     |
| MDS-UPDRS-III, mean (SD)            | 31.61 (19.40)      | 31.23<br>(19.49)     | 35.42<br>(18.44)    | 28.27<br>(9.66)       | 28.52<br>(9.73)      | 21                  | 0.119              | 0.209                     |
| Motor subtype, No. (%)              |                    |                      |                     |                       |                      |                     |                    |                           |
| PIGD                                | 113 (41.70)        | 100 (40.49)          | 13 (54.17)          | 12 (40.00)            | 12 (41.38)           | 0                   | 0.605              | 0.788                     |
| TD                                  | 116 (42.80)        | 107 (43.32)          | 9 (37.50)           | 17 (56.67)            | 16 (55.17)           | 1                   | 0.127              | 0.198                     |
| Indeterminate                       | 42 (15.50)         | 40 (16.19)           | 2 (8.33)            | 1 (3.33)              | 1 (3.45)             | 0                   | 0.148              | 0.150                     |
| MoCA, mean (SD)                     | 21.94 (5.03)       | 21.96 (5.04)         | 21.71 (5.09)        | 20.50<br>(5.29)       | 20.45<br>(5.38)      | 22                  | 0.672              | 0.555                     |
| HAMD, mean (SD)                     | 8.22 (6.16)        | 8.08 (6.18)          | 9.67 (5.88)         | 8.30 (7.20)           | 8.38 (7.31)          | 6                   | 0.816              | 0.674                     |
| HAMA, mean (SD)                     | 9.31 (6.44)        | 9.23 (6.44)          | 10.13 (6.62)        | 9.40 (7.62)           | 9.55 (7.71)          | 5                   | 0.890              | 0.755                     |
| PDSS-2, mean (SD)                   | 9.91 (5.94)        | 9.71 (6.04)          | 11.96 (4.40)        | 8.17 (3.86)           | 8.28 (3.88)          | 5                   | 0.110              | 0.236                     |

GBA-PD, glucocerebrosidase-related Parkinson disease; NGBA-PD, non-glucocerebrosidase-related Parkinson disease; PD, Parkinson disease; LEDD, levodopa equivalent daily dose; H-Y, Hoehn and Yahr; EOPD, early onset PD; MDS-UPDRS, Movement Disorder Society Unified Parkinson Disease Rating Scale; PIGD, postural instability/gait difficulty; TD, tremor dominant; MoCA, Montreal Cognitive Assessment; HAMD, Hamilton Depression Scale; HAMA, Hamilton Anxiety Scale; PDSS, Parkinson Disease Sleep Scale; SD, standard deviation. <sup>a</sup> Adjusted for sex, and disease duration; <sup>b</sup> Adjusted for age, and disease duration; <sup>c</sup> Adjusted for age, and sex; <sup>d</sup> Adjusted for sex; <sup>e</sup> Adjusted for age, sex, and disease duration. The remaining p values are calculated by adjusting for age, sex, disease duration, LEDD and years of education; The p<sup>1</sup> value is derived from a comparison of all patients who participated in the follow-up with all patients who did not participate in the follow-up. The p<sup>2</sup> value

was derived from a comparison between patients who participated in the follow-up and those who did not in the NGBA-PD study. No formal statistical comparison was performed within the GBA-PD subgroup because only one patient was not followed up. \*,  $p < 0.05$ .

**Supplement Table 8 Baseline demographic and clinical scale data for patients with GBA-PD (without patients carrying the unknown variant) and NGBA-PD.**

|                                     | GBA-PD          | NGBA-PD         | p Value            |
|-------------------------------------|-----------------|-----------------|--------------------|
| n                                   | 16              | 276             | -                  |
| Age, mean (SD), year                | 55.12 (12.04)   | 59.82 (10.32)   | 0.080 <sup>a</sup> |
| Sex, male, No. (%)                  | 7 (43.75)       | 121 (43.84)     | 0.950 <sup>b</sup> |
| Disease duration, mean (SD), year   | 3.59 (2.62)     | 3.73 (3.54)     | 0.991 <sup>c</sup> |
| Age at onset, mean (SD), year       | 51.53 (11.19)   | 56.09 (10.69)   | 0.097 <sup>d</sup> |
| EOPD, No. (%)                       | 7 (43.75)       | 90 (32.61)      | 0.357 <sup>d</sup> |
| Years of education, mean (SD), year | 11.50 (4.00)    | 10.00 (3.81)    | 0.167 <sup>c</sup> |
| LEDD, mean (SD), mg                 | 373.91 (277.84) | 301.04 (223.39) | 0.104 <sup>c</sup> |
| H-Y stage, mean (SD),               | 2.00 (0.73)     | 1.82 (0.74)     | 0.082              |
| MDS-UPDRS-I, mean (SD)              | 12.31 (4.13)    | 10.08 (6.23)    | 0.077              |
| MDS-UPDRS-II, mean (SD)             | 16.56 (5.40)    | 12.67 (7.76)    | <b>0.008*</b>      |
| MDS-UPDRS-III, mean (SD)            | 36.81 (16.53)   | 31.07 (18.73)   | <b>0.044*</b>      |
| Motor subtype, No. (%)              |                 |                 |                    |
| PIGD                                | 10 (62.50)      | 113 (40.94)     | <b>0.049*</b>      |
| TD                                  | 4 (25.00)       | 122 (44.20)     | 0.096              |
| Indeterminate                       | 2 (12.50)       | 41 (14.86)      | 0.701              |
| MoCA, mean (SD)                     | 20.63 (5.04)    | 21.80 (5.09)    | <b>0.004*</b>      |
| HAMD, mean (SD)                     | 9.44 (5.61)     | 8.11 (6.29)     | 0.287              |
| HAMA, mean (SD)                     | 10.25 (4.84)    | 9.27 (6.57)     | 0.405              |
| PDSS-2, mean (SD)                   | 14.00 (3.12)    | 9.56 (5.87)     | <b>0.001*</b>      |

GBA-PD, glucocerebrosidase-related Parkinson disease; NGBA-PD, non-glucocerebrosidase-related Parkinson disease; PD, Parkinson disease; LEDD, levodopa equivalent daily dose; H-Y, Hoehn and Yahr; EOPD, early onset PD; MDS-UPDRS, Movement Disorder Society Unified Parkinson Disease Rating Scale; PIGD, postural instability/gait difficulty; TD, tremor dominant; MoCA, Montreal Cognitive Assessment; HAMD, Hamilton Depression Scale; HAMA, Hamilton Anxiety Scale; PDSS, Parkinson Disease Sleep Scale; SD, standard deviation. <sup>a</sup> Adjusted for sex, and disease duration; <sup>b</sup> Adjusted for age, and disease duration; <sup>c</sup> Adjusted for age, and sex; <sup>d</sup> Adjusted for sex; <sup>e</sup> Adjusted for age, sex, and disease duration. The remaining *p* values are calculated by adjusting for age, sex, disease duration, LEDD and Years of education; \*, *p* < 0.05.

**Supplement Table 9 Comparison of <sup>11</sup>C-CFT SUVR, and <sup>18</sup>F-FDG Z-score between GBA-PD ( without patients carrying the unknown variant ) and NGBA-PD.**

| Region of interest          | GBA-PD,<br>mean (SD) | NGBA-PD,<br>mean (SD) | p Value           | q Value           |
|-----------------------------|----------------------|-----------------------|-------------------|-------------------|
| n                           | 17                   | 159                   | -                 | -                 |
| <sup>11</sup> C-CFT SUVR    |                      |                       |                   |                   |
| Caudate                     | 1.24 (0.43)          | 1.50 (0.46)           | <b>0.023*</b>     | <b>0.038*</b>     |
| Anterior Putamen            | 1.58 (0.40)          | 1.96 (0.53)           | <b>0.025*</b>     | <b>0.038*</b>     |
| Posterior Putamen           | 1.39 (0.24)          | 1.65 (0.43)           | 0.077             | 0.077             |
| <sup>18</sup> F-FDG Z-score |                      |                       |                   |                   |
| Prefrontal Lateral          | -1.86 (1.95)         | -1.38 (1.78)          | 0.287             | 0.813             |
| Prefrontal Medial           | -0.86 (1.32)         | -0.58 (1.65)          | 0.473             | 0.823             |
| Sensorimotor                | -0.57 (2.18)         | -0.86 (2.11)          | 0.580             | 0.823             |
| Anterior Cingulate          | 0.34 (1.62)          | -0.05 (1.47)          | 0.512             | 0.823             |
| Posterior Cingulate         | -0.56 (1.25)         | -0.38 (1.50)          | 0.546             | 0.823             |
| Precuneus                   | -2.14 (1.46)         | -0.51 (1.48)          | <b>&lt;0.001*</b> | <b>&lt;0.001*</b> |
| Parietal Superior           | -2.70 (1.32)         | -1.37 (1.88)          | <b>0.026*</b>     | 0.204             |
| Parietal Inferior           | -3.80 (1.64)         | -2.63 (2.03)          | 0.066             | 0.281             |
| Occipital Lateral           | -1.80 (1.70)         | -0.12 (2.46)          | <b>0.036*</b>     | 0.204             |
| Primary Visual              | 0.98 (1.82)          | 1.24 (1.98)           | 0.533             | 0.823             |
| Temporal Lateral            | -0.03 (0.82)         | -0.14 (1.43)          | 0.898             | 0.961             |
| Temporal Mesial             | 1.00 (2.93)          | -0.14 (1.43)          | 0.426             | 0.823             |
| Cerebellum Whole            | -0.64 (2.25)         | 0.17 (1.49)           | 0.126             | 0.428             |
| Pons                        | 0.17 (2.17)          | 0.04 (1.68)           | 0.948             | 0.988             |
| Caudate                     | 0.66 (1.40)          | 1.05 (5.39)           | 0.736             | 0.953             |
| Putamen                     | 1.95 (1.71)          | 1.78 (10.15)          | 0.904             | 0.961             |
| Thalamus                    | 1.46 (1.48)          | 0.92 (2.84)           | 0.785             | 0.953             |

p values were calculated by generalized linear model, adjusting for age, levodopa equivalent daily dose (LEDD), sex, and disease duration. The q value is obtained by applying the false discovery rate (FDR) correction to the p-values derived from the analysis of the generalised linear model. SD, standard deviation; GBA-PD, glucocerebrosidase-related Parkinson disease; NGBA-PD, non-glucocerebrosidase-related Parkinson disease; PD, Parkinson disease; SUVR, standardized uptake value ratio; \*, p < 0.05.

**eTable 10 Longitudinal progression of clinical outcomes in GBA-PD (without unknown variants) and NGBA-PD over 3 years: linear mixed-effects model analysis.**

|                          | NGBA-PD           |                   | GBA-PD            |                   | $\beta$<br>(time*group) | 95% CI            | p<br>value    |
|--------------------------|-------------------|-------------------|-------------------|-------------------|-------------------------|-------------------|---------------|
|                          | Baseline          | Follow-up         | Baseline          | Follow-up         |                         |                   |               |
| <b>n</b>                 | 276               | 247               | 16                | 16                |                         |                   |               |
| LEDD, mean (SE)          | 299.75<br>(12.78) | 452.06<br>(16.68) | 387.19<br>(53.29) | 647.69<br>(66.52) | 108.19                  | -17.05,<br>233.43 | 0.090         |
| H-Y stage, mean (SE)     | 1.84 (0.04)       | 1.91 (0.05)       | 2.13 (0.17)       | 2.37 (0.19)       | 0.17                    | -0.18, 0.51       | 0.347         |
| MDS-UPDRS-I, mean (SE)   | 10.11 (0.36)      | 11.46 (0.36)      | 12.87 (1.49)      | 15.13 (1.46)      | 0.92                    | -1.23, 3.07       | 0.400         |
| MDS-UPDRS-II, mean (SE)  | 12.76 (0.44)      | 13.42 (0.36)      | 17.86 (1.80)      | 19.40 (1.47)      | 0.87                    | -1.47, 3.22       | 0.463         |
| MDS-UPDRS-III, mean (SE) | 30.78 (1.07)      | 33.91 (1.09)      | 39.90 (4.39)      | 50.09 (4.40)      | 7.05                    | 0.36, 13.74       | <b>0.039*</b> |
| MoCA, mean (SE)          | 21.94 (0.25)      | 20.08 (0.26)      | 19.02 (1.01)      | 16.33 (1.07)      | -0.84                   | -2.23, 0.55       | 0.237         |
| HAMD, mean (SE)          | 8.09 (0.38)       | 8.75 (0.34)       | 9.90 (1.56)       | 13.19 (1.39)      | 2.63                    | 0.25, 5.01        | <b>0.030*</b> |
| HAMA, mean (SE)          | 9.28 (0.39)       | 9.88 (0.39)       | 10.78 (1.61)      | 13.19 (1.57)      | 1.82                    | -0.81, 4.44       | 0.174         |
| PDSS-2, mean (SE)        | 9.55 (0.35)       | 11.44 (0.42)      | 14.36 (1.43)      | 17.16 (1.67)      | 0.90                    | -2.20, 4.01       | 0.567         |
| <b>Motor subtype</b>     |                   |                   |                   |                   |                         |                   |               |
| PIGD, No. (%)            | 113 (40.94)       | 111 (44.94)       | 10 (62.50)        | 10 (62.50)        | -                       | -                 | -             |
| TD, No. (%)              | 122 (44.20)       | 106 (42.91)       | 4 (25.00)         | 4 (25.00)         | -                       | -                 | -             |
| Indeterminate, No. (%)   | 41 (14.86)        | 30 (12.15)        | 2 (12.50)         | 2 (12.50)         | -                       | -                 | -             |

The mean (SE) refers to the marginal estimate of the mean and standard error (SE) obtained through linear mixed-effects model analysis. GBA-PD, glucocerebrosidase-related Parkinson disease; NGBA-PD, non-glucocerebrosidase-related Parkinson disease; PD, Parkinson disease; LEDD, levodopa equivalent daily dose; H-Y, Hoehn and Yahr; EOPD, early onset PD; MDS-UPDRS, Movement Disorder Society Unified Parkinson Disease Rating Scale; PIGD, postural instability/gait difficulty; TD, tremor dominant; MoCA, Montreal Cognitive Assessment; HAMD, Hamilton Depression Scale; HAMA, Hamilton Anxiety Scale; PDSS, Parkinson Disease Sleep Scale; CI, confidence interval; \*,  $p < 0.05$ .

**Supplement Table 11 Simple effects analysis of variables with interactive effects in linear mixed effects models in GBA-PD (without unknown variants) and NGBA-PD patients.**

| MDS-UPDRS-III |           |           |                             |      |                   |                   |               |
|---------------|-----------|-----------|-----------------------------|------|-------------------|-------------------|---------------|
| Group         | (I) Time  | (J) Time  | Mean value difference (I-J) | SE   | Degree of freedom | p value           | 95% CI        |
| GBA-PD        | Follow-up | Baseline  | 10.38                       | 3.28 | 265.96            | <b>0.002*</b>     | 3.92, 16.83   |
|               | Baseline  | Follow-up | -10.38                      | 3.28 | 265.96            | <b>0.002*</b>     | -16.83, 3.92  |
| NGBA-PD       | Follow-up | Baseline  | 3.18                        | 0.83 | 272.18            | <b>&lt;0.001*</b> | 1.55, 4.81    |
|               | Baseline  | Follow-up | -3.18                       | 0.83 | 272.18            | <b>&lt;0.001*</b> | -4.81, -1.55  |
| Time          | (I) Group | (J) Group | Mean value difference (I-J) | SE   | Degree of freedom | p value           | 95% CI        |
| Baseline      | GBA-PD    | NGBA-PD   | 5.81                        | 4.78 | 366.87            | 0.224             | -3.58, 15.20  |
|               | NGBA-PD   | GBA-PD    | -5.81                       | 4.78 | 366.87            | 0.224             | -15.20, -3.58 |
| Follow-up     | GBA-PD    | NGBA-PD   | 13.01                       | 4.78 | 368.32            | <b>0.007*</b>     | 3.61, 22.41   |
|               | NGBA-PD   | GBA-PD    | -13.01                      | 4.78 | 368.32            | <b>0.007*</b>     | -22.41, -3.61 |
| HAMD          |           |           |                             |      |                   |                   |               |
| Group         | (I) Time  | (J) Time  | Mean value difference (I-J) | SE   | Degree of freedom | p value           | 95% CI        |
| GBA-PD        | Follow-up | Baseline  | 3.31                        | 1.17 | 258.09            | <b>0.005*</b>     | 1.02, 5.61    |
|               | Baseline  | Follow-up | -3.31                       | 1.17 | 258.09            | <b>0.005*</b>     | -5.61, -1.02  |
| NGBA-PD       | Follow-up | Baseline  | 0.68                        | 0.30 | 265.53            | <b>0.022*</b>     | 0.10, 1.26    |
|               | Baseline  | Follow-up | -0.68                       | 0.30 | 265.53            | <b>0.022*</b>     | -1.26, -0.10  |
| Time          | (I) Group | (J) Group | Mean value difference (I-J) | SE   | Degree of freedom | p value           | 95% CI        |
| Baseline      | GBA-PD    | NGBA-PD   | 1.33                        | 1.53 | 378.35            | 0.387             | -1.69, 4.34   |
|               | NGBA-PD   | GBA-PD    | -1.33                       | 1.53 | 378.35            | 0.387             | -4.34, 1.69   |
| Follow-up     | GBA-PD    | NGBA-PD   | 3.96                        | 1.54 | 380.02            | <b>0.010*</b>     | 0.94, 6.98    |
|               | NGBA-PD   | GBA-PD    | -3.96                       | 1.54 | 380.02            | <b>0.010*</b>     | -6.98, -0.94  |

GBA-PD, glucocerebrosidase-related Parkinson disease; NGBA-PD, non-glucocerebrosidase-related Parkinson disease; PD, Parkinson disease; LEDD, levodopa equivalent daily dose; H-Y, Hoehn and Yahr; MDS-UPDRS, Movement Disorder Society Unified Parkinson Disease Rating Scale; MoCA, Montreal Cognitive Assessment; HAMD, Hamilton Depression Scale; HAMA, Hamilton Anxiety Scale; SE, standard error; CI, confidence interval; \*, p < 0.05.

**Supplement Table 12 Comparison of annual progression rates in clinical scales between GBA-PD (without unknown variants) and NGBA-PD patients.**

|                          | GBA-PD         | NGBA-PD       | p Value       |
|--------------------------|----------------|---------------|---------------|
| n                        | 16             | 247           | -             |
| LEDD, mean (SD)          | 85.26 (111.78) | 51.85 (80.38) | 0.126         |
| H-Y stage, mean (SD)     | 0.08 (0.28)    | 0.03 (0.23)   | 0.332         |
| MDS-UPDRS-I, mean (SD)   | 0.85 (0.75)    | 0.47 (1.45)   | 0.255         |
| MDS-UPDRS-II, mean (SD)  | 0.64 (1.96)    | 0.32 (1.54)   | 0.325         |
| MDS-UPDRS-III, mean (SD) | 3.46 (1.62)    | 1.05 (4.50)   | <b>0.028*</b> |
| MoCA, mean (SD)          | -0.95 (0.26)   | -0.62 (0.93)  | 0.156         |
| HAMD, mean (SD)          | 1.13 (0.82)    | 0.23 (1.59)   | <b>0.013*</b> |
| HAMA, mean (SD)          | 0.86 (0.83)    | 0.23 (1.75)   | 0.087         |
| PDSS-2, mean (SD)        | 1.00 (1.28)    | 0.61 (2.08)   | 0.385         |

p values were calculated by generalized linear model, adjusting for age, sex, years of education, and disease duration. GBA-PD, glucocerebrosidase-related Parkinson disease; NGBA-PD, non-glucocerebrosidase-related Parkinson disease; PD, Parkinson disease; LEDD, levodopa equivalent daily dose; H-Y, Hoehn and Yahr; MDS-UPDRS, Movement Disorder Society Unified Parkinson Disease Rating Scale; MoCA, Montreal Cognitive Assessment; HAMD, Hamilton Depression Scale; HAMA, Hamilton Anxiety Scale; PDSS, Parkinson Disease Sleep Scale; SE, standard error; CI, confidence interval; \*,  $p < 0.05$ .
